# Supplementary material for: (Mg,Mn)-dual doping synergism towards luminescence and electrical properties of ZnO/p-Si heterojunction diodes
Source: Royal Society of Chemistry journal article supplement (doi:10.1039/d3ra06140j), 2023-01-01
Supplement: d3ra06140j1.pdf [file d3ra06140j1.pdf]

Supplementary information

## (Mg,Mn)-dual doping synergism towards luminescence and electrical properties of ZnO/p-Si heterojunction diodes

Ganesha Krishna V S and Mahesha M G\*

*Department of Physics, Manipal Institute of Technology, Manipal Academy of Higher Education 576104, India*

\*Corresponding Author.

Email: [mahesha.mg@manipal.edu](mailto:mahesha.mg@manipal.edu)

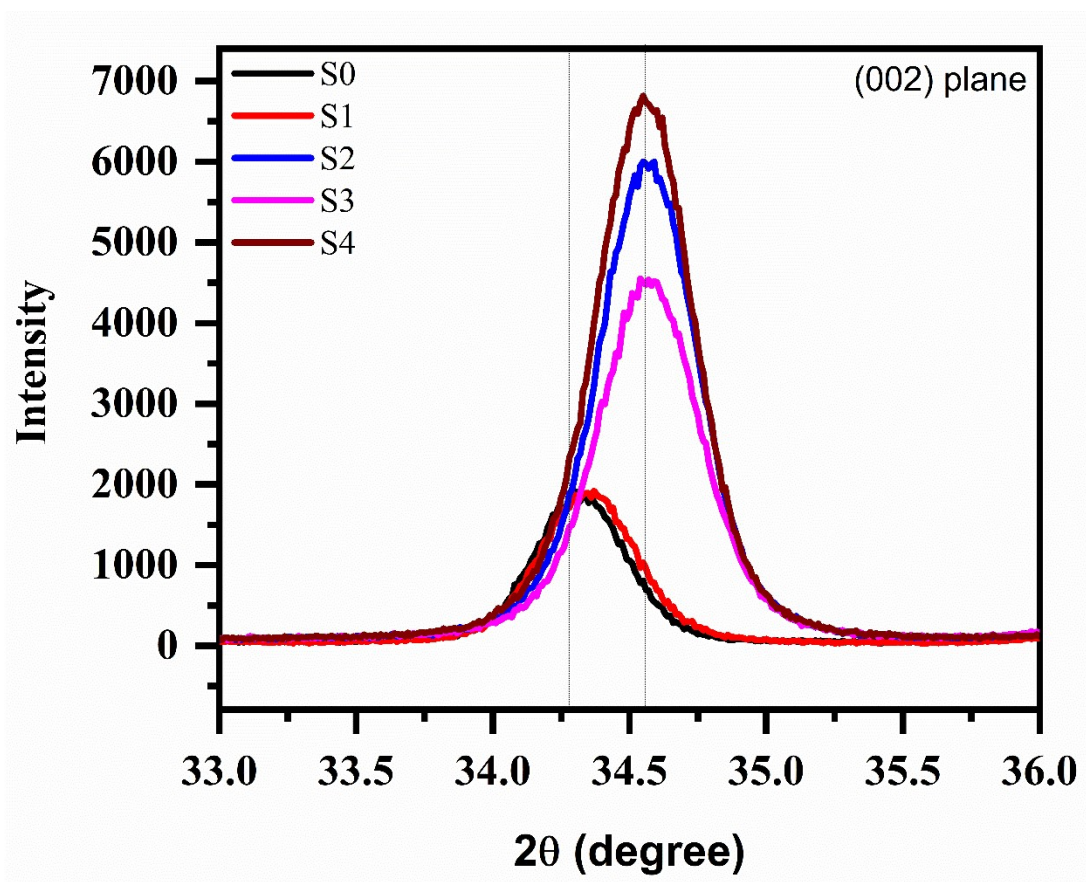

Fig.S1: shift in the peak position of (002) plane for the (Mn,Mg):ZnO samples.
